# Supplementary material for: The spatiotemporal control of KatG2 catalase‐peroxidase contributes to the invasiveness of Fusarium graminearum in host plants
Source: PubMed Central journal article supplement (PMC6637876; doi:10.1111/mpp.12785), 2019-03-27
Supplement: MPP-20-685-s003.pdf [file MPP-20-685-s003.pdf]

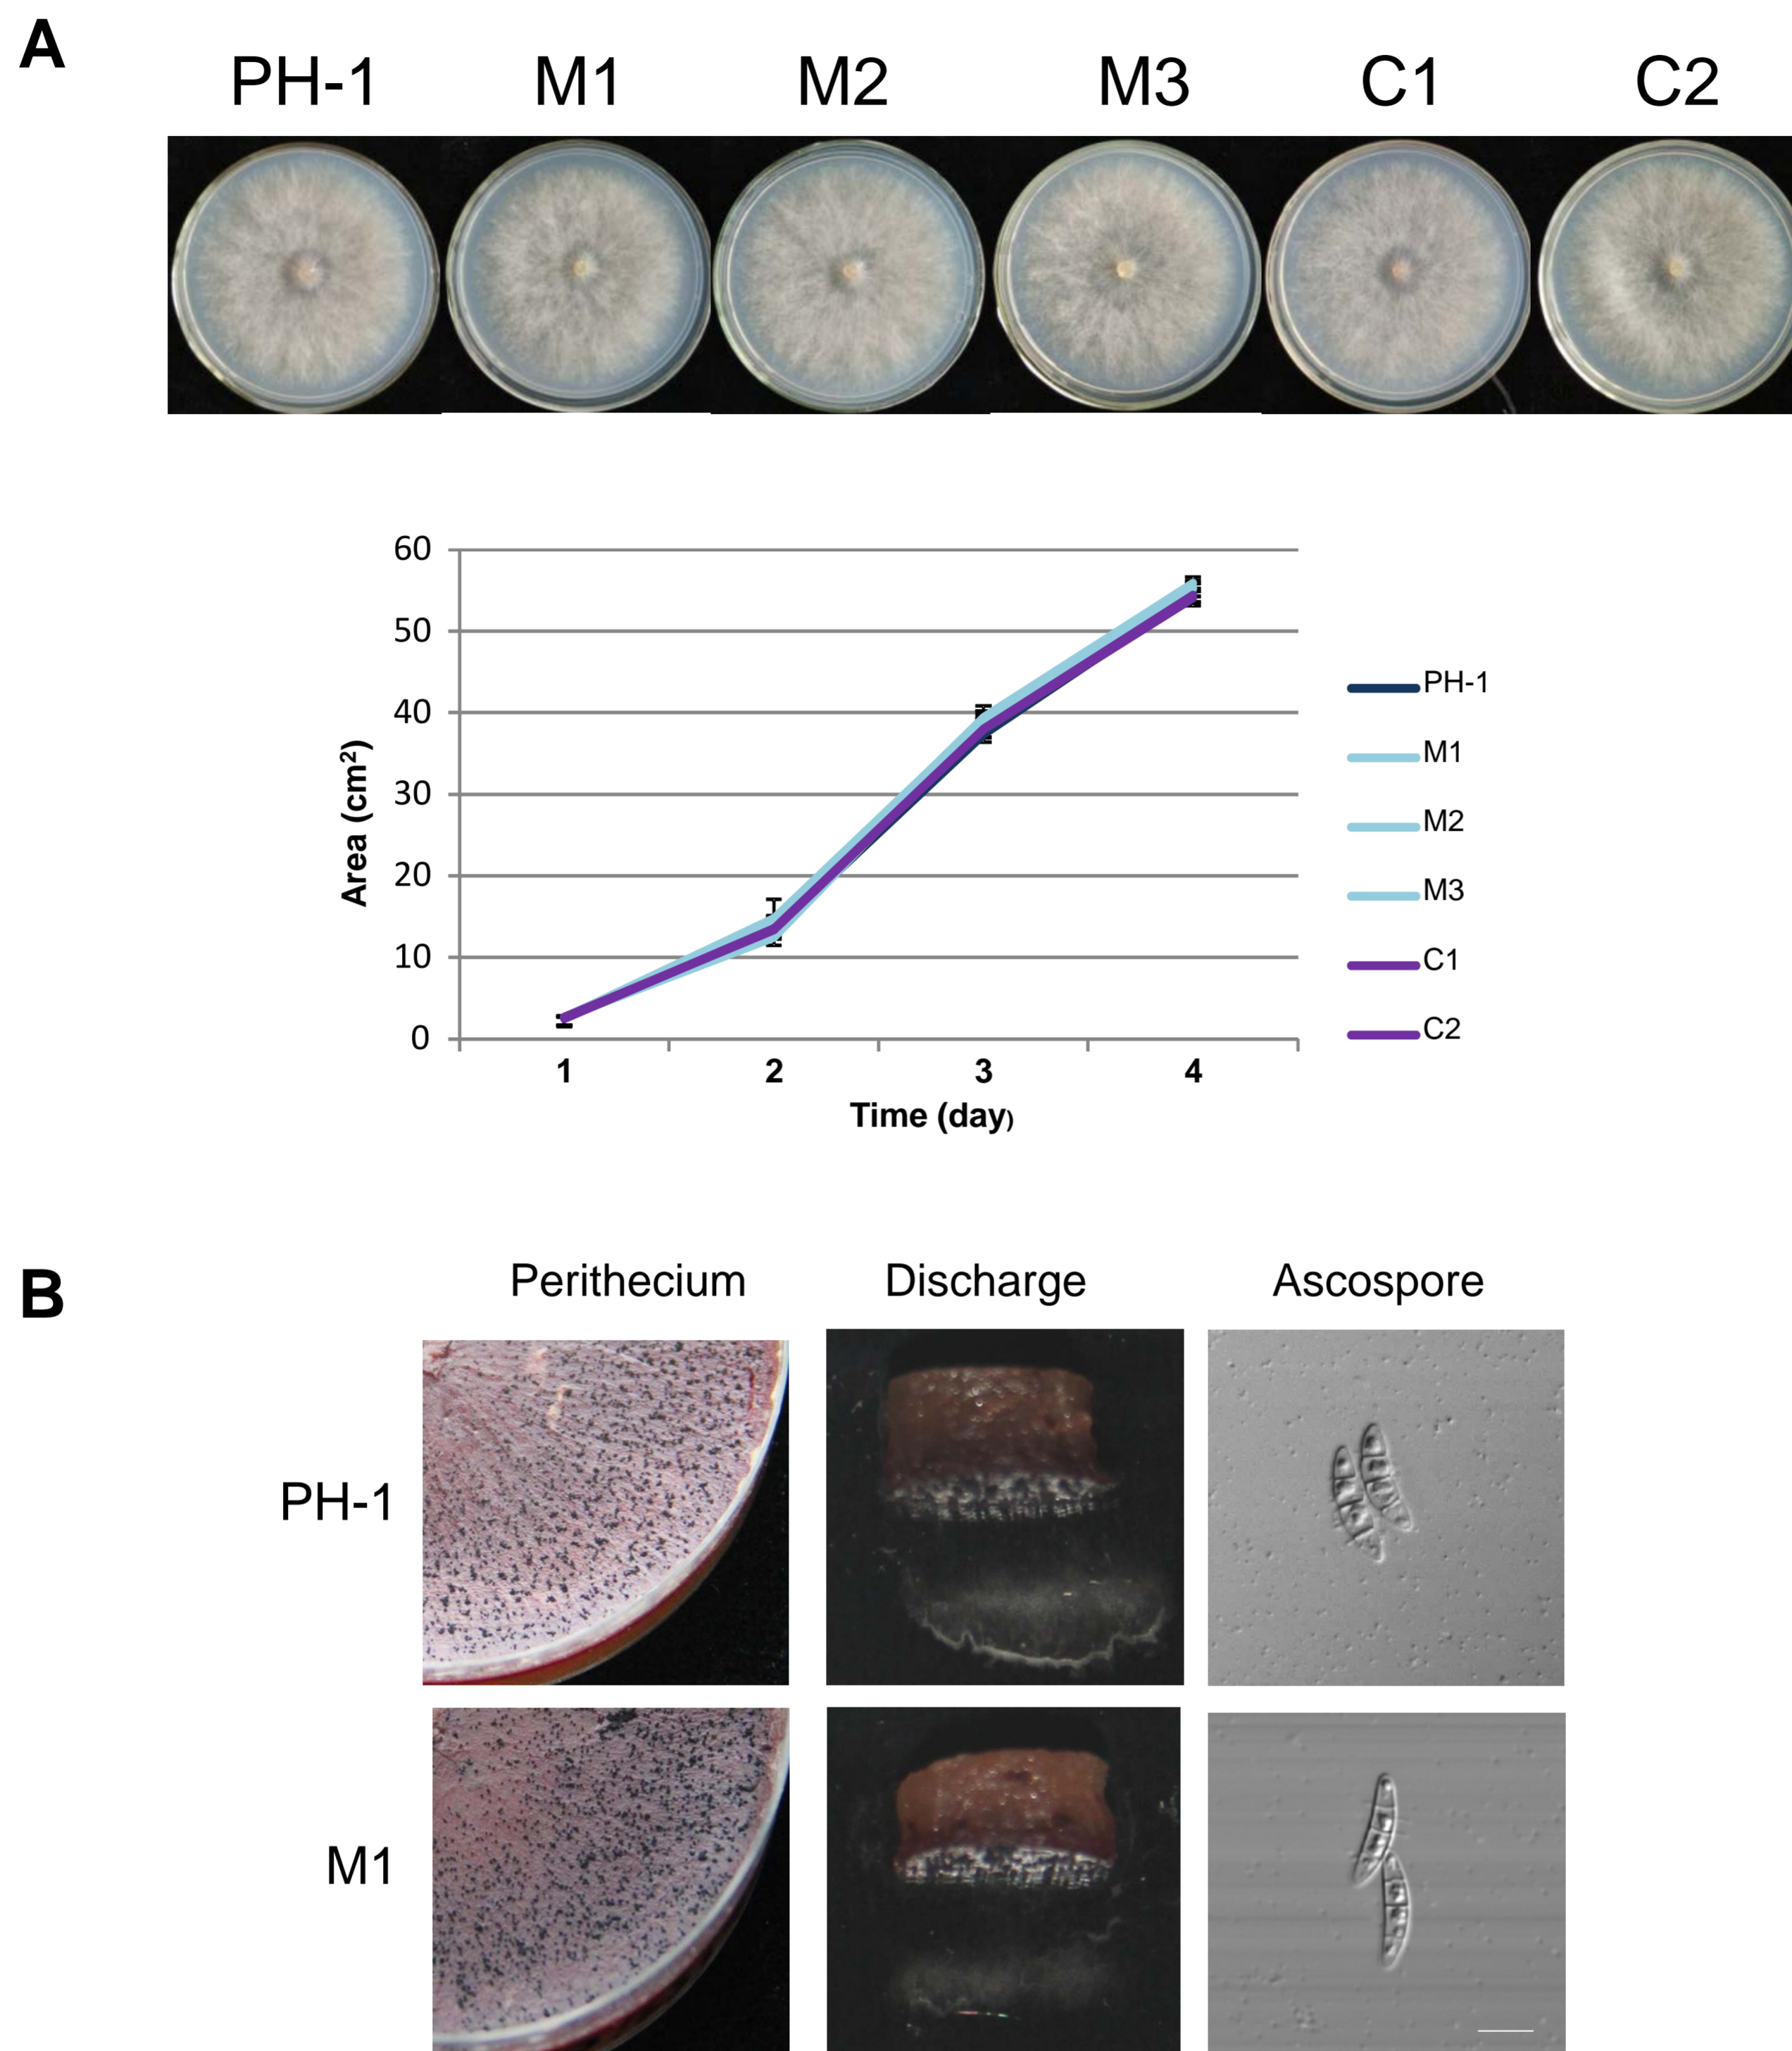

**Fig. S3  $\Delta KatG2$  mutants showed normal vegetative growth and reproductive development *in vitro*.** (A) Wild-type (PH-1),  $\Delta KatG2$  mutant (M1, M2, and M3) and complemented strains (C1 and C2) were cultured on synthetic nutrient-poor agar (SNA) plates. Photographs were taken four days post inoculation (dpi). The colony areas of PH-1,  $\Delta KatG2$  mutants and complemented strains were examined each day. (B) Perithecium growth on carrot agar plates, ascospore discharge and morphology of ascospores of wild-type (PH-1) and  $\Delta KatG2$  mutant (M1) strains. Scale bar=10  $\mu\text{m}$ .
