# Supplementary material for: The spatiotemporal control of KatG2 catalase‐peroxidase contributes to the invasiveness of Fusarium graminearum in host plants
Source: PubMed Central journal article supplement (PMC6637876; doi:10.1111/mpp.12785), 2019-03-27
Supplement: MPP-20-685-s004.pdf [file MPP-20-685-s004.pdf]

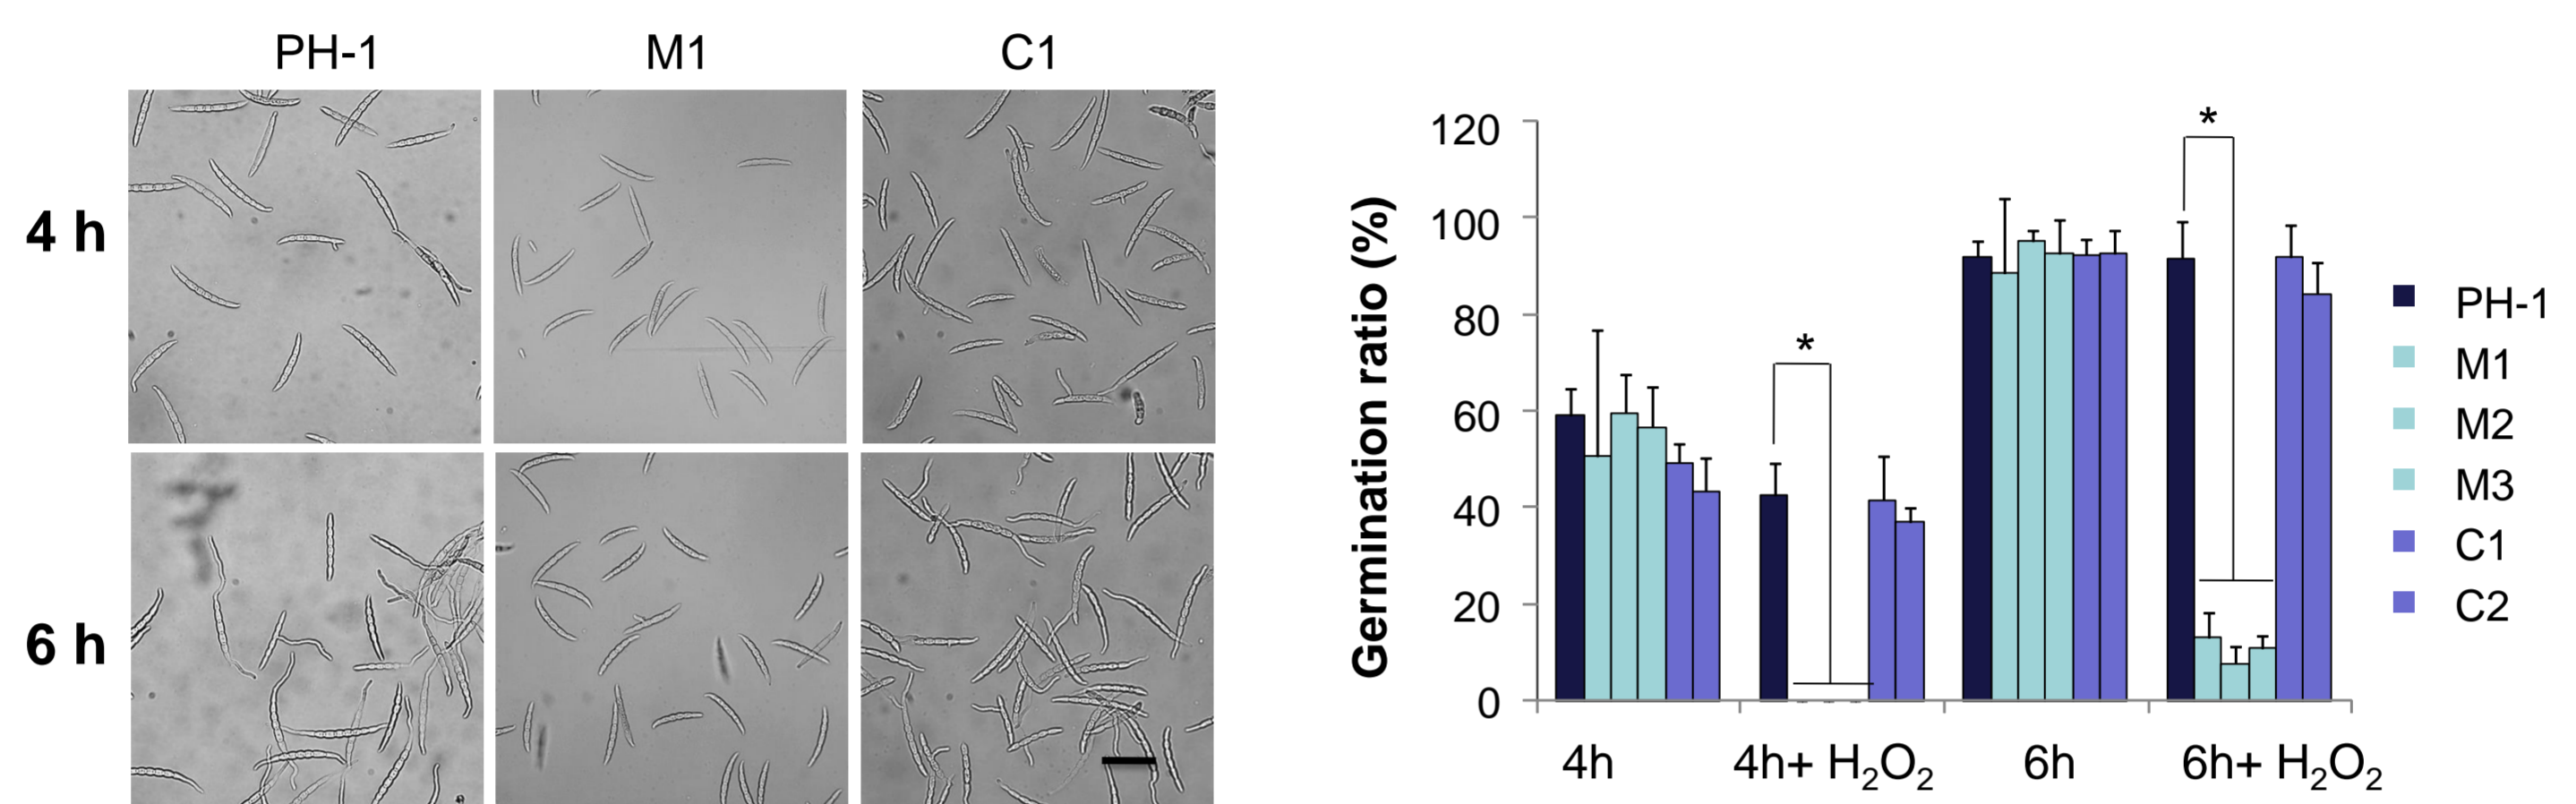

**Fig. S4  $\Delta KatG2$  mutants showed increased sensitivity to exogenous  $H_2O_2$  during conidial germination.**

(A) Conidial germination percentages of PH-1,  $\Delta KatG2$  mutant (M1) and complemented strains (C1) in liquid CM were examined after 4 and 6 h of exposure to 1 mM  $H_2O_2$ . Scale bar=50  $\mu m$ . More than 200 conidia were scored for each line. Asterisks indicate significant differences (Student's *t*-test,  $P<0.05$ ).
