# Supplementary material for: The spatiotemporal control of KatG2 catalase‐peroxidase contributes to the invasiveness of Fusarium graminearum in host plants
Source: PubMed Central journal article supplement (PMC6637876; doi:10.1111/mpp.12785), 2019-03-27
Supplement: MPP-20-685-s006.pdf [file MPP-20-685-s006.pdf]

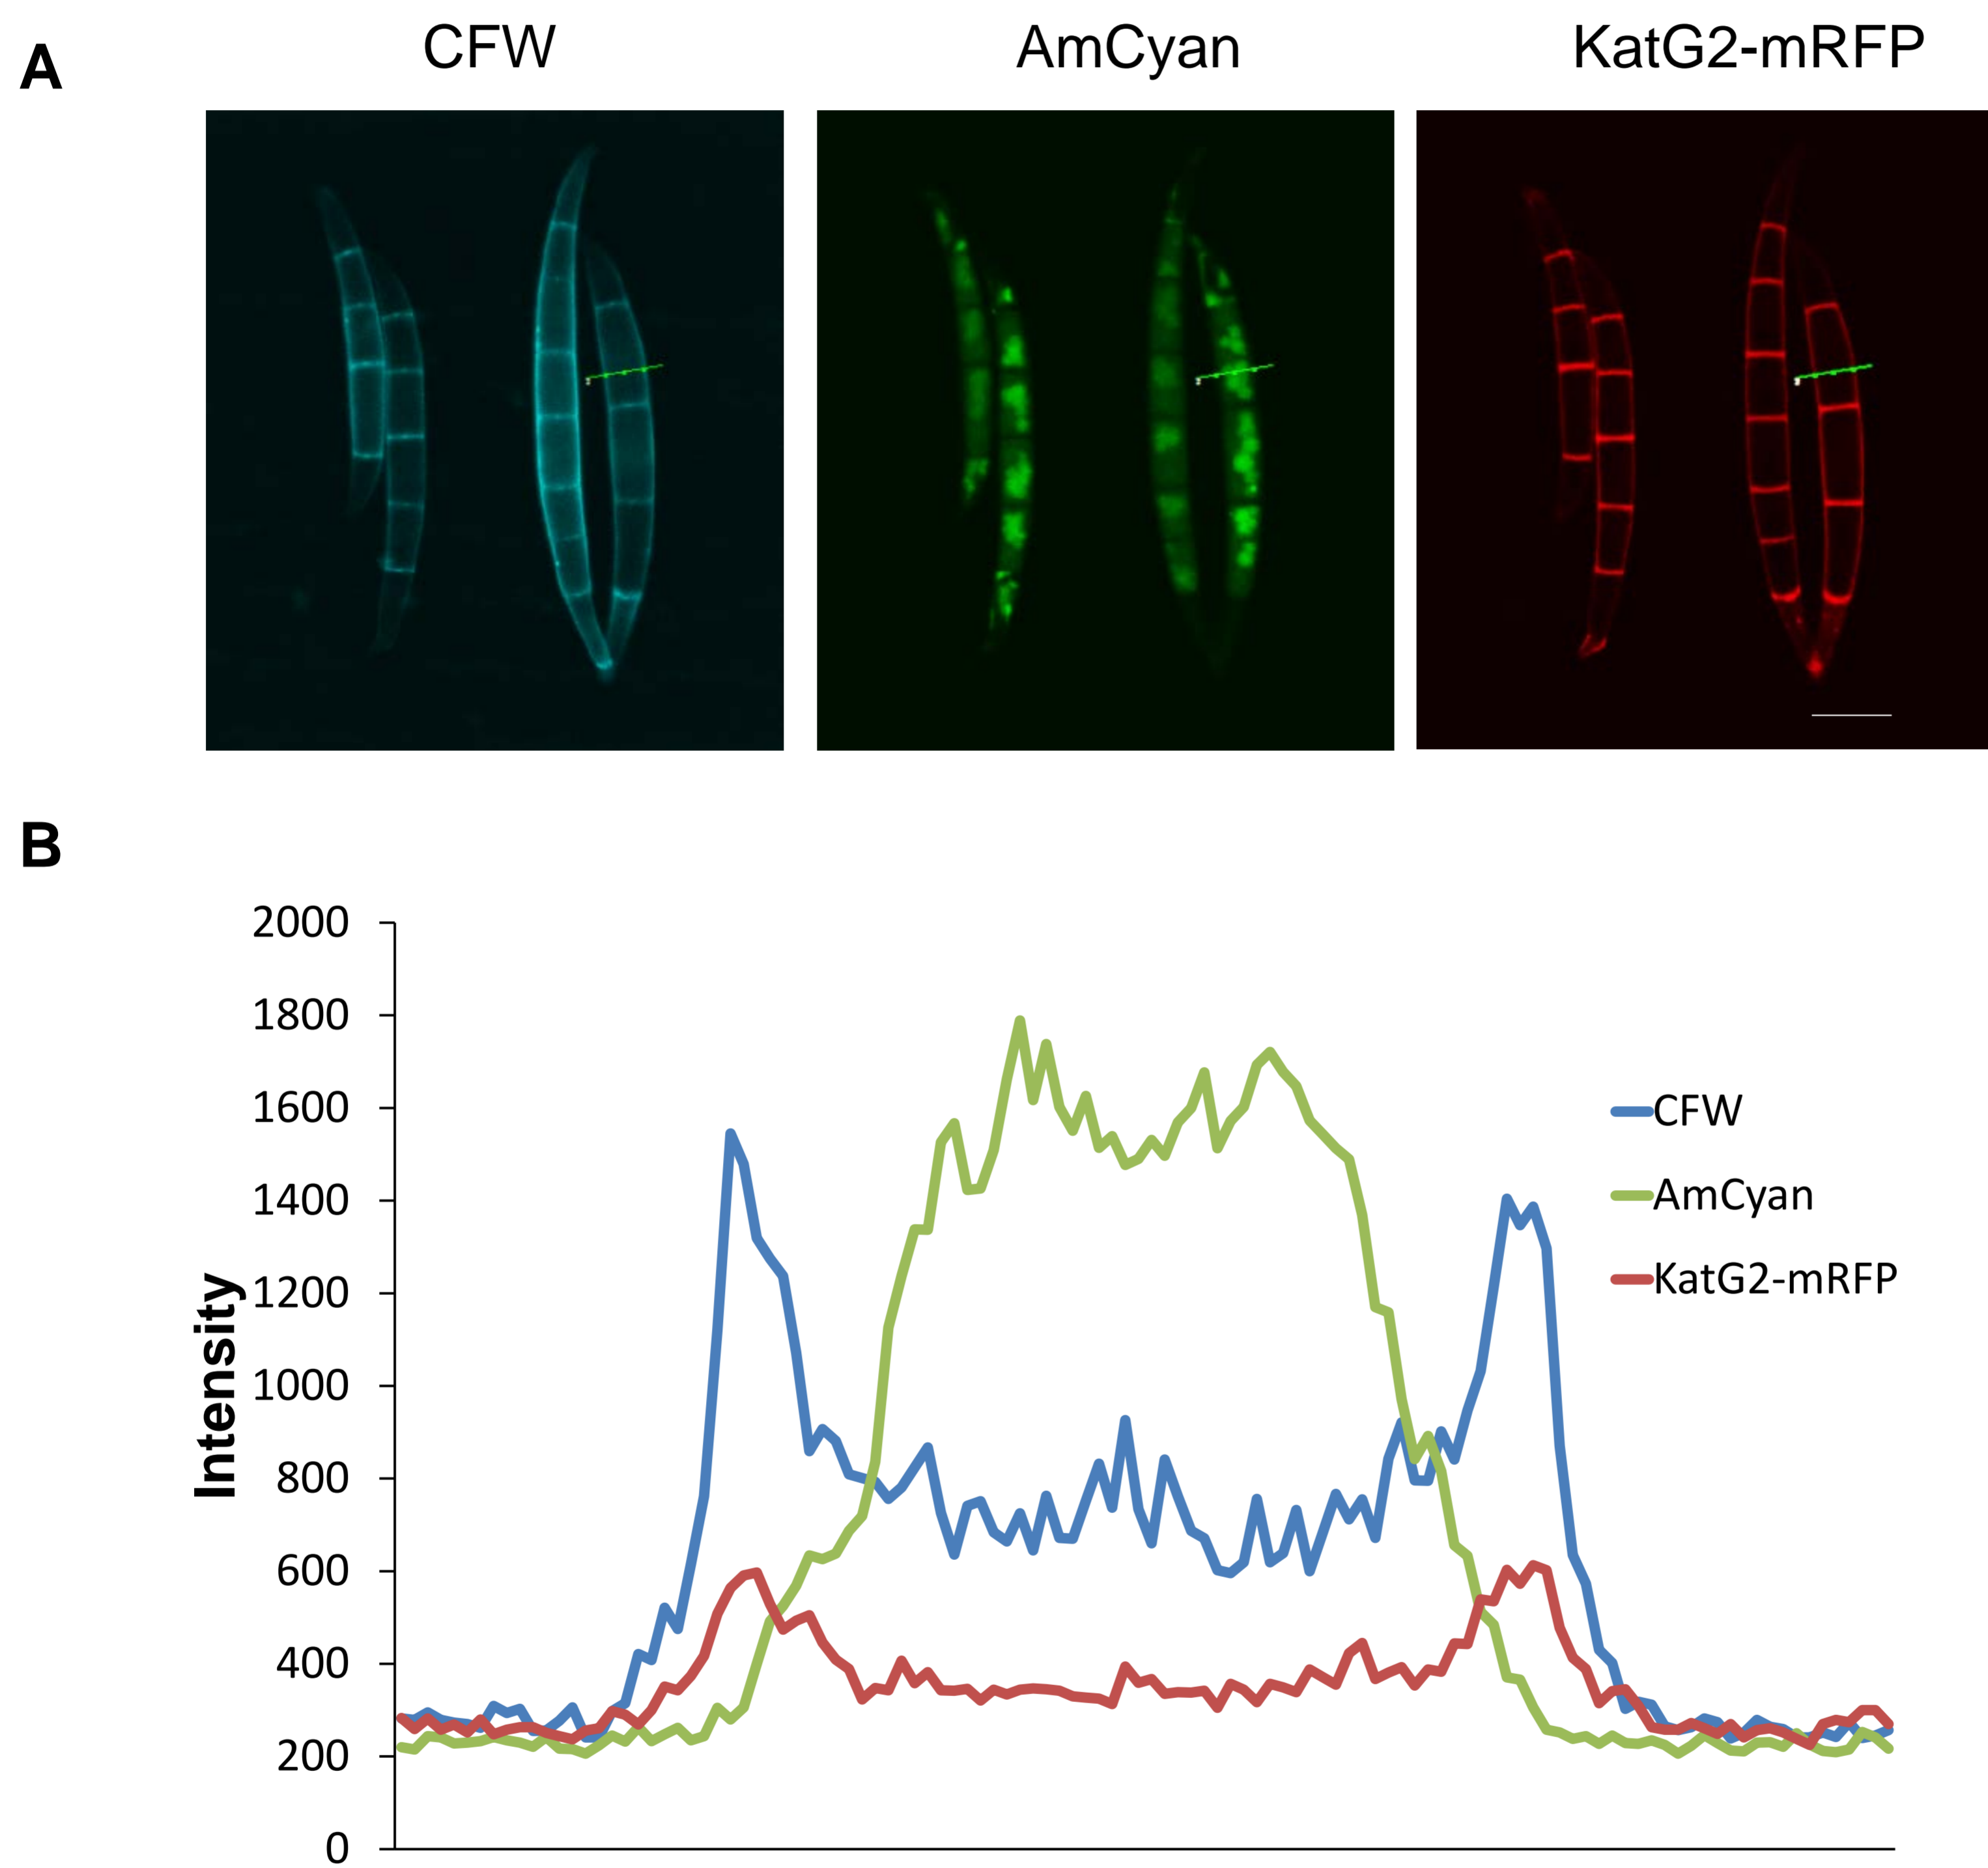

**Fig. S6 KatG2-mRFP colocalized with calcofluor white, a fungal cell wall stain.** (A) The fluorescent stain calcofluor white (CFW) binds cellulose and chitin of conidia. AmCyan fluorescence localized intracellularly, and KatG2-mRFP colocalized on the cell wall and septa with CFW (1 g/L). Bar=10  $\mu$ m. (B) Fluorescence signal distribution is plotted along the line shown in A.
