# Supplementary material for: The spatiotemporal control of KatG2 catalase‐peroxidase contributes to the invasiveness of Fusarium graminearum in host plants
Source: PubMed Central journal article supplement (PMC6637876; doi:10.1111/mpp.12785), 2019-03-27
Supplement: MPP-20-685-s008.pdf [file MPP-20-685-s008.pdf]

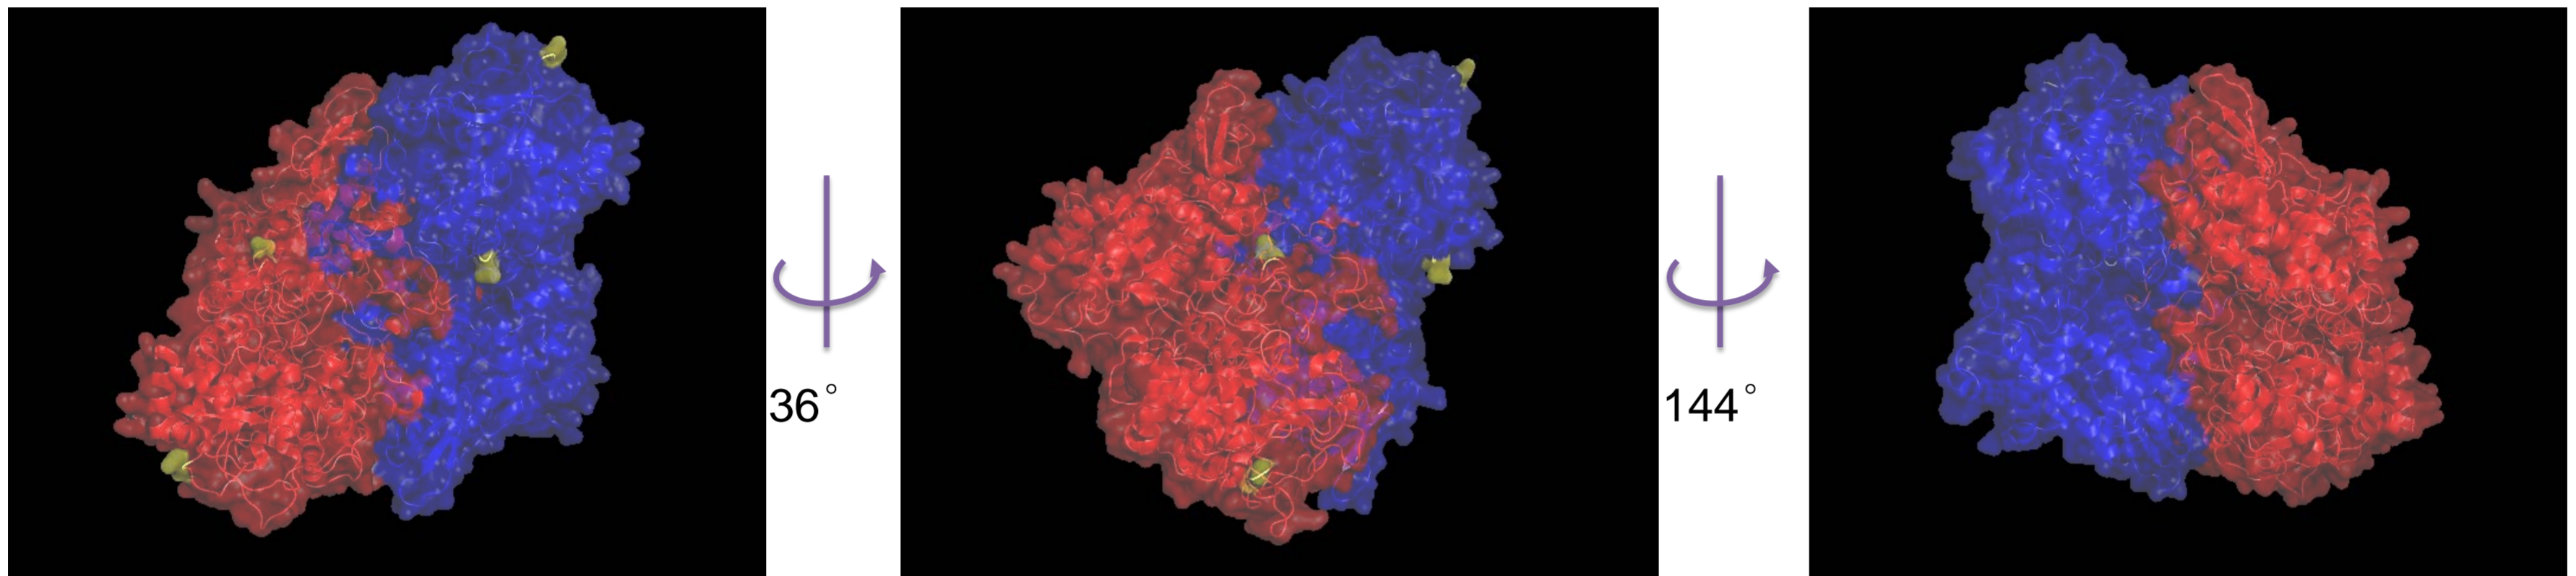

**Fig. S8 N-glycosylation sites of KatG2 localized at the surface of the KatG2 tertiary structure.** Homology modeling of KatG2 using the SWISS-MODEL web server. KatG2 forms a homodimer, and the yellow sites indicate the asparagines at positions 238 and 391, which were predicted to be modified with N-glycosylation.
