# Supplementary material for: The spatiotemporal control of KatG2 catalase‐peroxidase contributes to the invasiveness of Fusarium graminearum in host plants
Source: PubMed Central journal article supplement (PMC6637876; doi:10.1111/mpp.12785), 2019-03-27
Supplement: MPP-20-685-s009.pdf [file MPP-20-685-s009.pdf]

**A**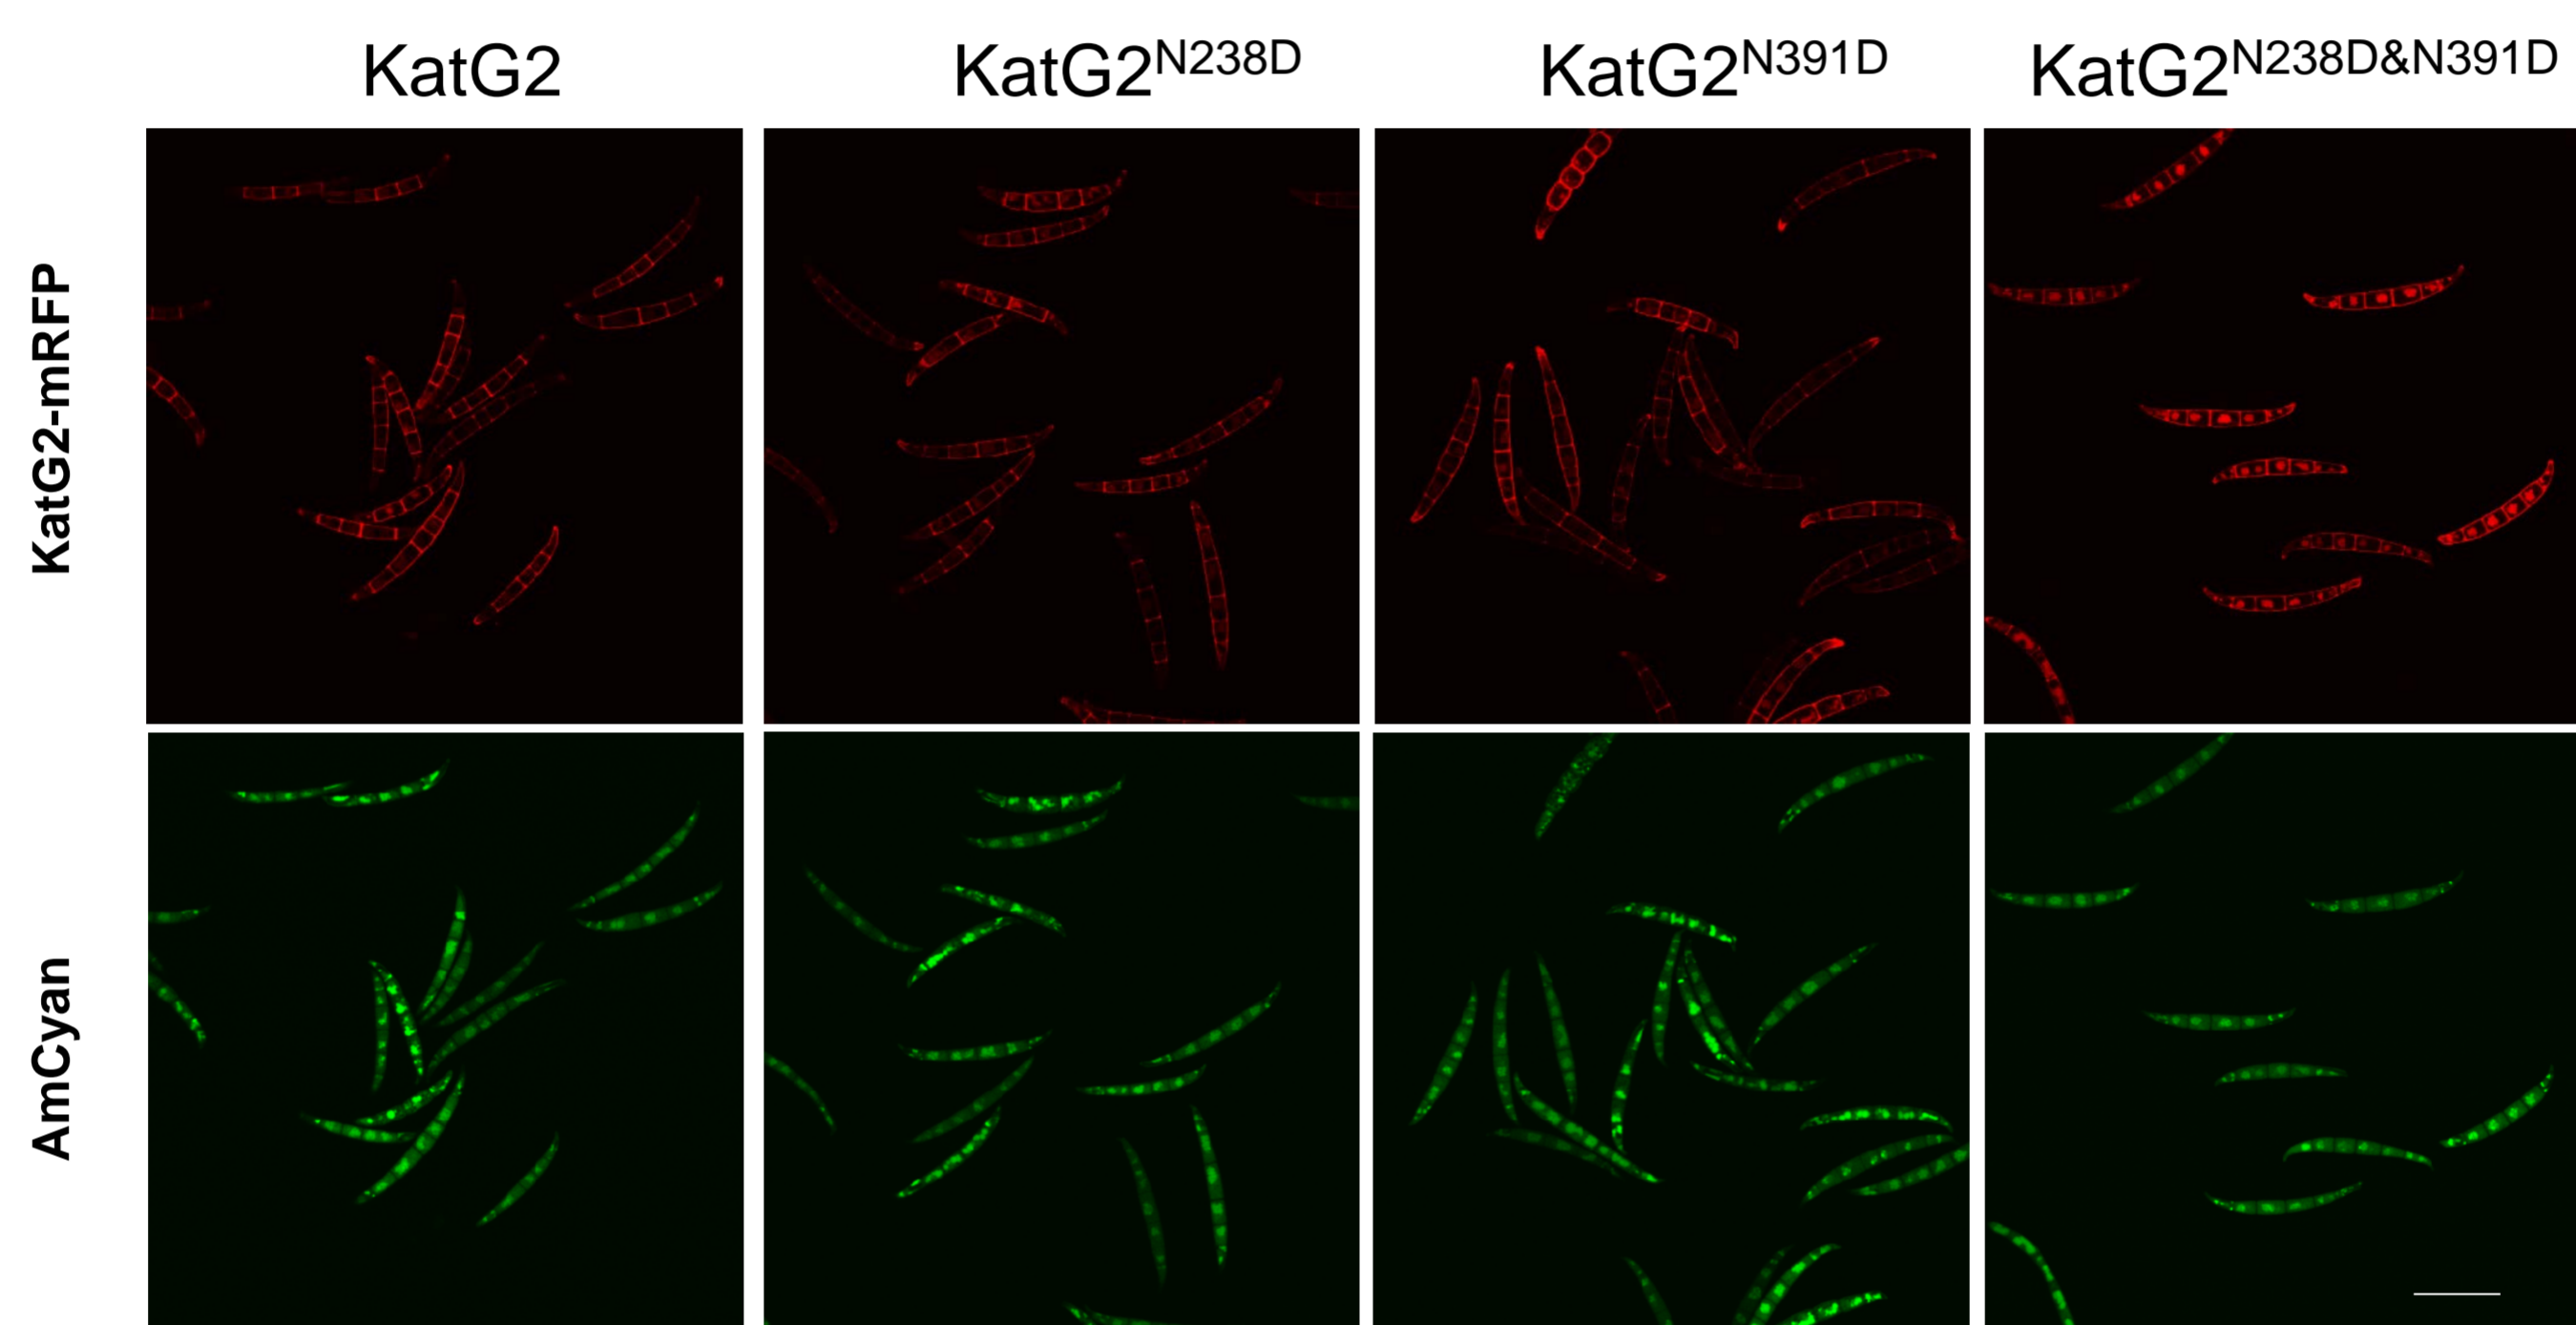**B**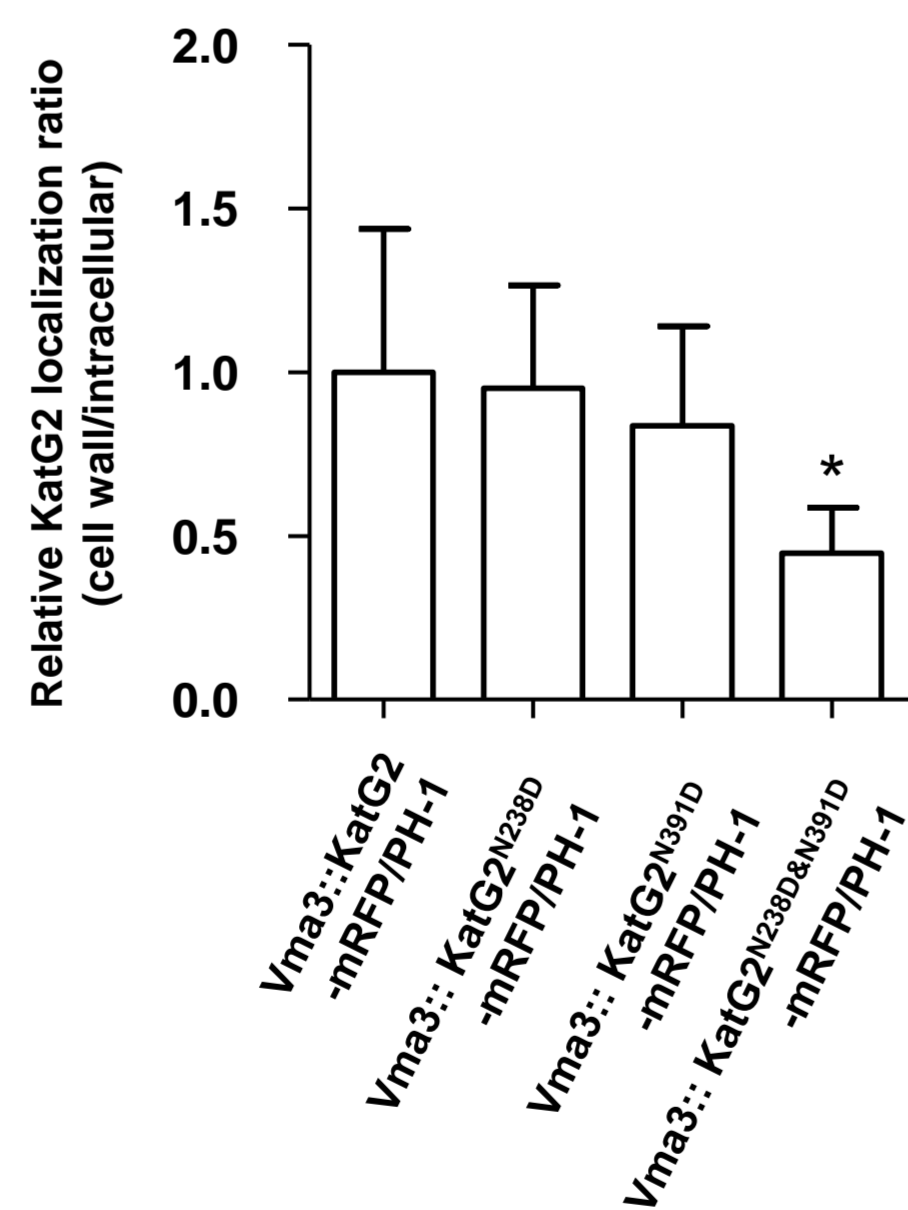

**Fig. S9 Asparagine residues at positions 238 and 391 of KatG2 regulate the cell wall distribution of KatG2.** (A) KatG2-mRFP localization in conidia with or without mutation of N-glycosylation sites. To analyze the localization of KatG2 in conidia, the mutation sites were introduced to the plasmid in Fig. 4B, which was then transformed into PH-1 protoplasts. Bar=30  $\mu$ m. (B) Statistical analysis of KatG2 localization using AmCyan as a reference. Error bars indicate standard deviation, the experiment was repeated three times, and asterisks indicate significant differences (Student's *t*-test  $P < 0.05$ ).
