# Supplementary material for: The spatiotemporal control of KatG2 catalase‐peroxidase contributes to the invasiveness of Fusarium graminearum in host plants
Source: PubMed Central journal article supplement (PMC6637876; doi:10.1111/mpp.12785), 2019-03-27
Supplement: MPP-20-685-s010.pdf [file MPP-20-685-s010.pdf]

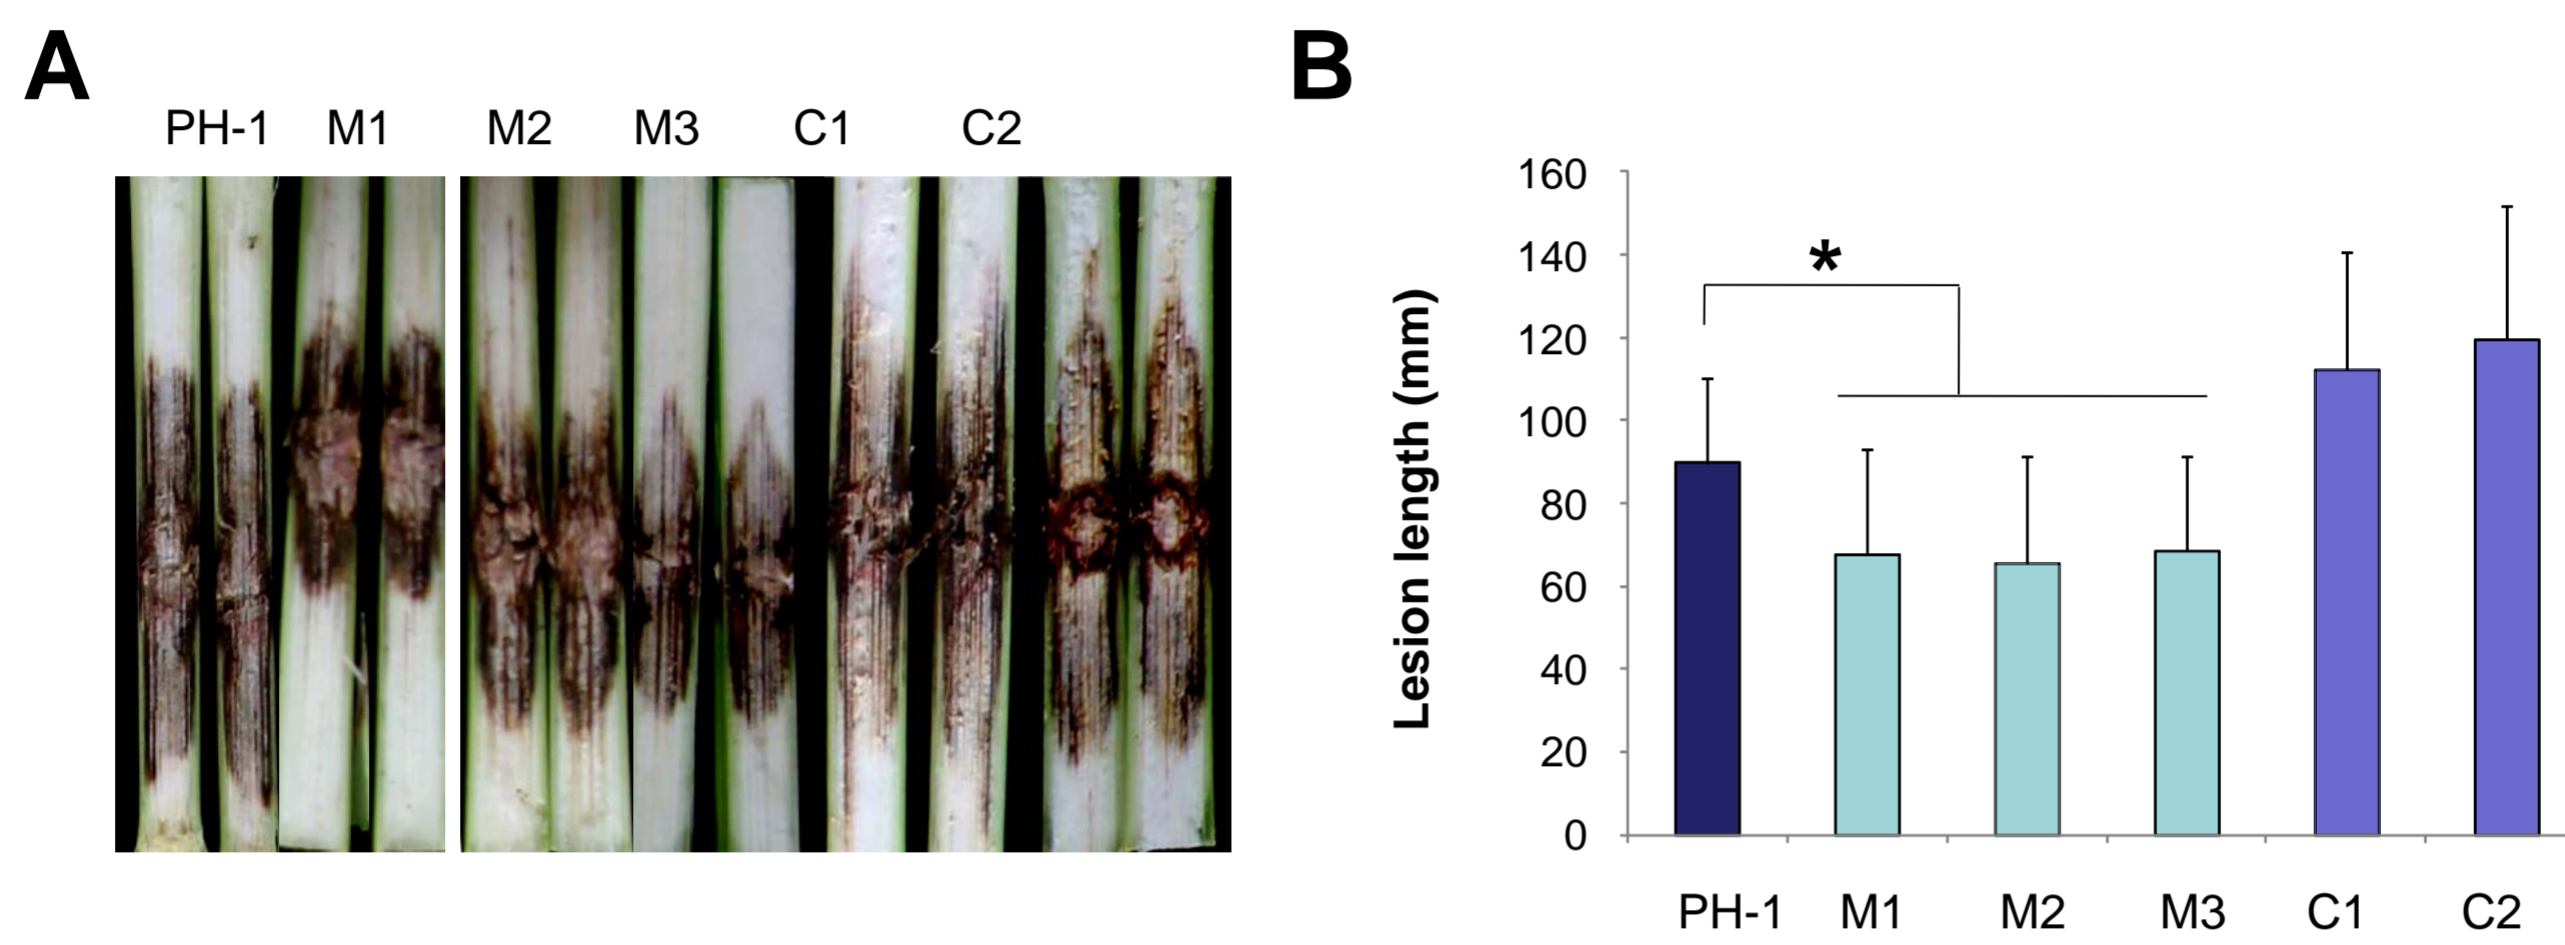

**Fig. S10** Assays of  $\Delta KatG2$  infection on maize stalks. (A) Diseased maize stalks inoculated with PH-1,  $\Delta KatG2$  mutants and complemented strains at 14 dpi. (B) Lesion length of infected stalks at 14 dpi. Error bars indicate standard errors derived from three independent experiments. Student's *t*-test  $P < 0.05$ .
